# Supplementary figures and images for: Novel SrTi1−xFexO3 nanocubes synthesized by microwave-assisted hydrothermal method
Source: Royal Society of Chemistry journal article supplement (doi:10.1039/c2ce25229e), 2012-01-01

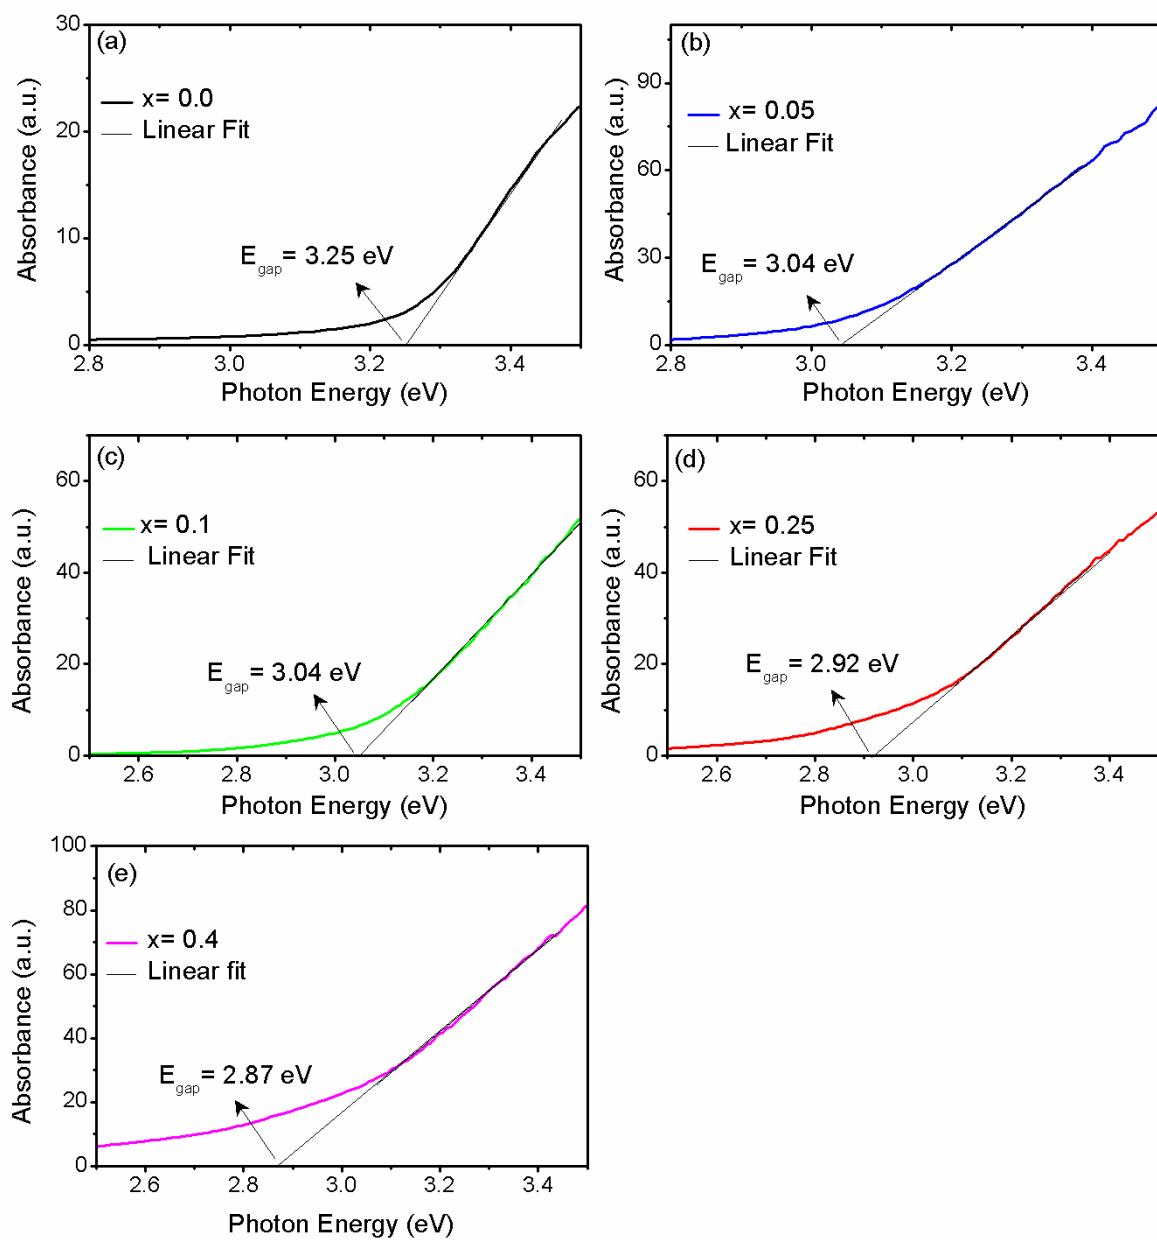

Figure 1S: UV-vis spectra dependent of the absorbance for the SrTi<sub>1-x</sub>Fe<sub>x</sub>O<sub>3</sub>

Supplement: c2ce25229e.pdf [file c2ce25229e.pdf]
